# Supplementary material
Source: PubMed Central journal article supplement (PMC6964118)
Supplement: ONCO-25-55-s001.pdf [file ONCO-25-55-s001.pdf]

Supplemental Figure for:  
 Cumulative antibiotic use significantly decreases efficacy of checkpoint inhibitors in patients with advanced cancer  
 Nadina Tinsley et al.

**Figure S1. Methods to calculate progression free survival (PFS) and overall survival (OS).** Flow diagrams were present in this figure to illustrate how PFS and OS were calculated in this study.
