# Supplementary material
Source: PubMed Central journal article supplement (PMC6964118)
Supplement: ONCO-25-55-s002.pdf [file ONCO-25-55-s002.pdf]

Supplemental Tables for:  
Cumulative antibiotic use significantly decreases efficacy of checkpoint inhibitors in patients with advanced cancer  
Nadina Tinsley et al.

**Table S1.** Characteristics of patients treated with antibiotics

| Metric                    | Categories                                   | N    | Percentage |
|---------------------------|----------------------------------------------|------|------------|
| ICI treatment             | Pembrolizumab                                | 42   | 45.7%      |
|                           | Nivolumab                                    | 46   | 50.0%      |
|                           | Ipilimumab                                   | 13   | 14.1%      |
|                           | Combination <sup>1</sup>                     | 11   | 12.0%      |
|                           | Avelumab                                     | 2    | 2.2%       |
|                           | Atezolizumab                                 | 0    | 0.0%       |
|                           | Antibiotic administration route <sup>2</sup> | Oral | 77         |
| Intravenous               |                                              | 26   | 28.3%      |
| Infection <sup>2</sup>    | Respiratory                                  | 37   | 40.2%      |
|                           | Skin                                         | 10   | 10.9%      |
|                           | Sepsis                                       | 8    | 8.7%       |
|                           | Genitourinary                                | 7    | 7.6%       |
|                           | Unknown                                      | 6    | 6.5%       |
|                           | Mixed                                        | 5    | 5.4%       |
|                           | URTI                                         | 3    | 3.3%       |
|                           | CNS                                          | 2    | 2.2%       |
| Time elapsed <sup>3</sup> | Other                                        | 14   | 15.2%      |
|                           | 2 weeks before                               | 19   | 20.7%      |
|                           | 6 weeks after                                | 75   | 81.5%      |

|  |         |   |      |
|--|---------|---|------|
|  | Overlap | 2 | 2.2% |
|--|---------|---|------|

ICI: immune checkpoint inhibitor; RCC: renal cell carcinoma; NSCLC: non-small cell lung cancer.

1. Combination therapy consists of treatment with 4 cycles of nivolumab and ipilimumab, followed by single agent nivolumab.
2. Some patients experienced >1 route of antibiotic therapy or >1 infection type.
3. Some patients will have received antibiotics 2 weeks before and 6 weeks after, with overlap.

**Table S2.** Association between clinical factors and antibiotics use. The association between antibiotics use and other clinical factors were examined using chi-square tests.

| <b>Clinical factors</b>              | <b>Association with antibiotics</b> |
|--------------------------------------|-------------------------------------|
| <b>Gender</b>                        | 0.297                               |
| <b>Age</b>                           | 0.540                               |
| <b>Number of previous treatments</b> | 0.852                               |
| <b>Cancer type</b>                   | 0.251                               |
| <b>Participate in trials</b>         | 0.853                               |
| <b>Number of metastatic sites</b>    | 0.776                               |
| <b>ECOG performance status</b>       | <b>0.026*</b>                       |
| <b>Comorbidities</b>                 | 0.954                               |

\*statistically significant

**Table S3a. Impact of cumulative use of antibiotics on PFS**

| <b>Name of covariates</b>                    | <b>Category</b>           | <b>p-values</b> | <b>Hazard ratio</b> | <b>95% CI</b> |
|----------------------------------------------|---------------------------|-----------------|---------------------|---------------|
| <b>ECOG performance status</b>               | 1 vs. 0                   | 0.198           | 1.270               | 0.883-1.829   |
|                                              | 2+ vs. 0                  | 0.0006          | 3.141               | 1.638-6.025   |
| <b>Comorbidities</b>                         | yes. Vs. no               | 0.022           | 1.425               | 1.052-1.930   |
| <b>Cumulative use of ABX</b>                 | Single course vs. no      | 0.279           | 1.324               | 0.796-2.200   |
|                                              | cumulative courses vs. no | 0.026           | 2.625               | 1.245-6.127   |
| <b>Interaction of ECOG PS and use of ABX</b> | PS=1 & single ABX         | 0.856           | 0.929               | 0.420-2.057   |
|                                              | PS=2+ & single ABX        | 0.385           | 0.599               | 0.188-1.905   |
|                                              | PS=1 & cumulative ABX     | 0.937           | 0.959               | 0.341-2.698   |
|                                              | PS=2+ & cumulative ABX    | 0.021           | 0.225               | 0.063-0.798   |

ECOG: Eastern Cooperative Oncology Group PS: Performance Status ABX: antibiotics

**Table S3b. Impact of cumulative use of antibiotics on OS**

| <b>Name of covariates</b>         | <b>Category</b>           | <b>p-values</b> | <b>Hazard ratio</b> | <b>95% CI</b> |
|-----------------------------------|---------------------------|-----------------|---------------------|---------------|
| <b>Participate in trials</b>      | Yes vs. no                | 0.002           | 0.559               | 0.384-0.812   |
| <b>Number of metastatic sites</b> | 2 vs. 0/1                 | 0.697           | 1.120               | 0.633-1.983   |
|                                   | 3+ vs. 0/1                | 0.004           | 2.289               | 1.304-4.019   |
| <b>ECOG performance status</b>    | 1 vs. 0                   | 0.002           | 1.812               | 1.238-2.651   |
|                                   | 2+ vs. 0                  | 0.00003         | 3.027               | 1.801-5.090   |
| <b>Comorbidities</b>              | Yes vs. no                | 0.020           | 1.523               | 1.069-2.169   |
| <b>Use of antibiotics</b>         | Single course vs. no      | 0.294           | 1.259               | 0.819-1.934   |
|                                   | cumulative courses vs. no | 0.009           | 1.904               | 1.178-2.078   |

ECOG: Eastern Cooperative Oncology Group
